# Supplementary material for: Curvature induction and membrane remodeling by FAM134B reticulon homology domain assist selective ER-phagy
Source: PubMed Central journal article supplement (PMC6542808; doi:10.1038/s41467-019-10345-3), 2019-05-30

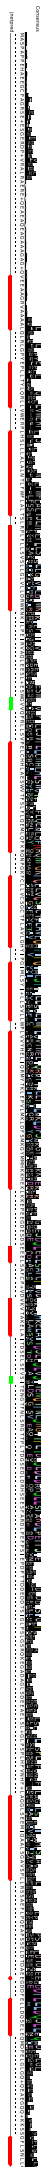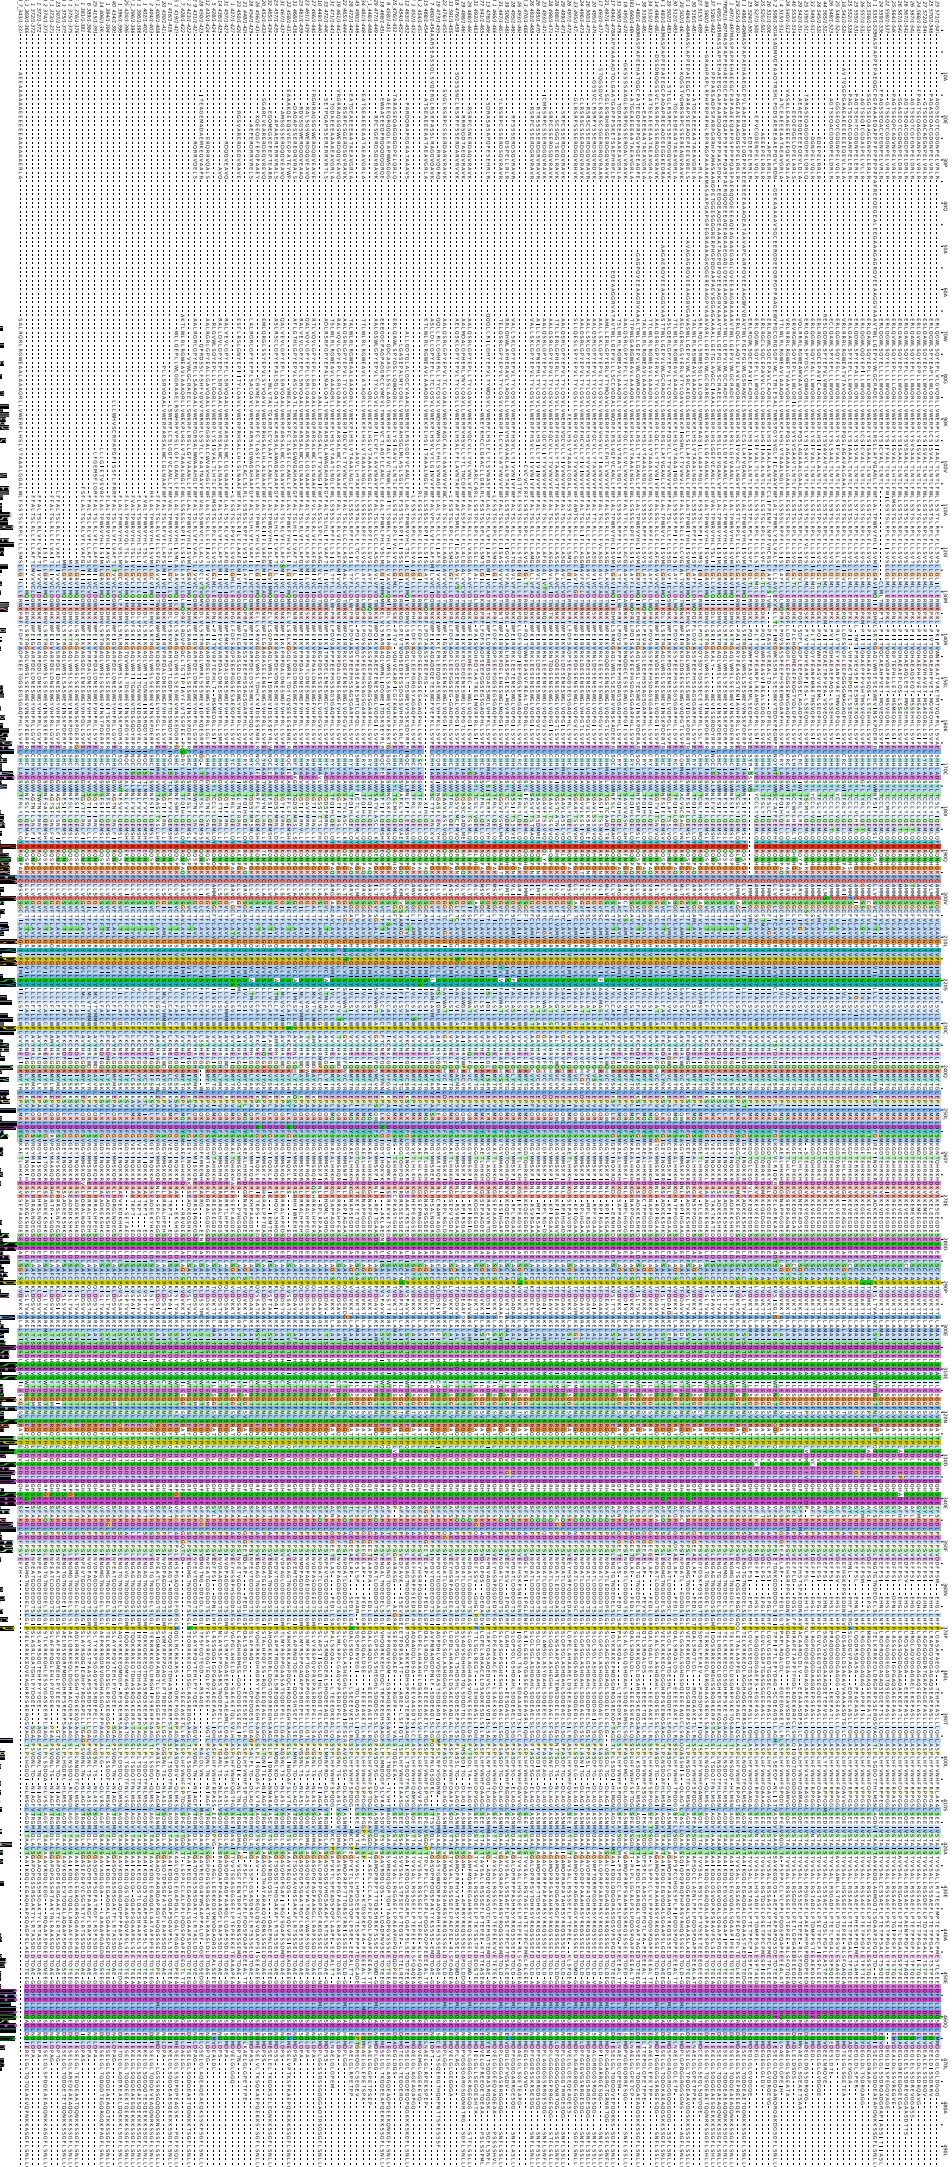

Supplement: 41467_2019_10345_MOESM8_ESM.pdf [file 41467_2019_10345_MOESM8_ESM.pdf]
